# Supplementary material
Source: publisher site journal article supplement (https://www.dovepress.com/article/415415)

**Supplemental File 1.** Lockdown timeline in New York City and at NYU Langone Health.

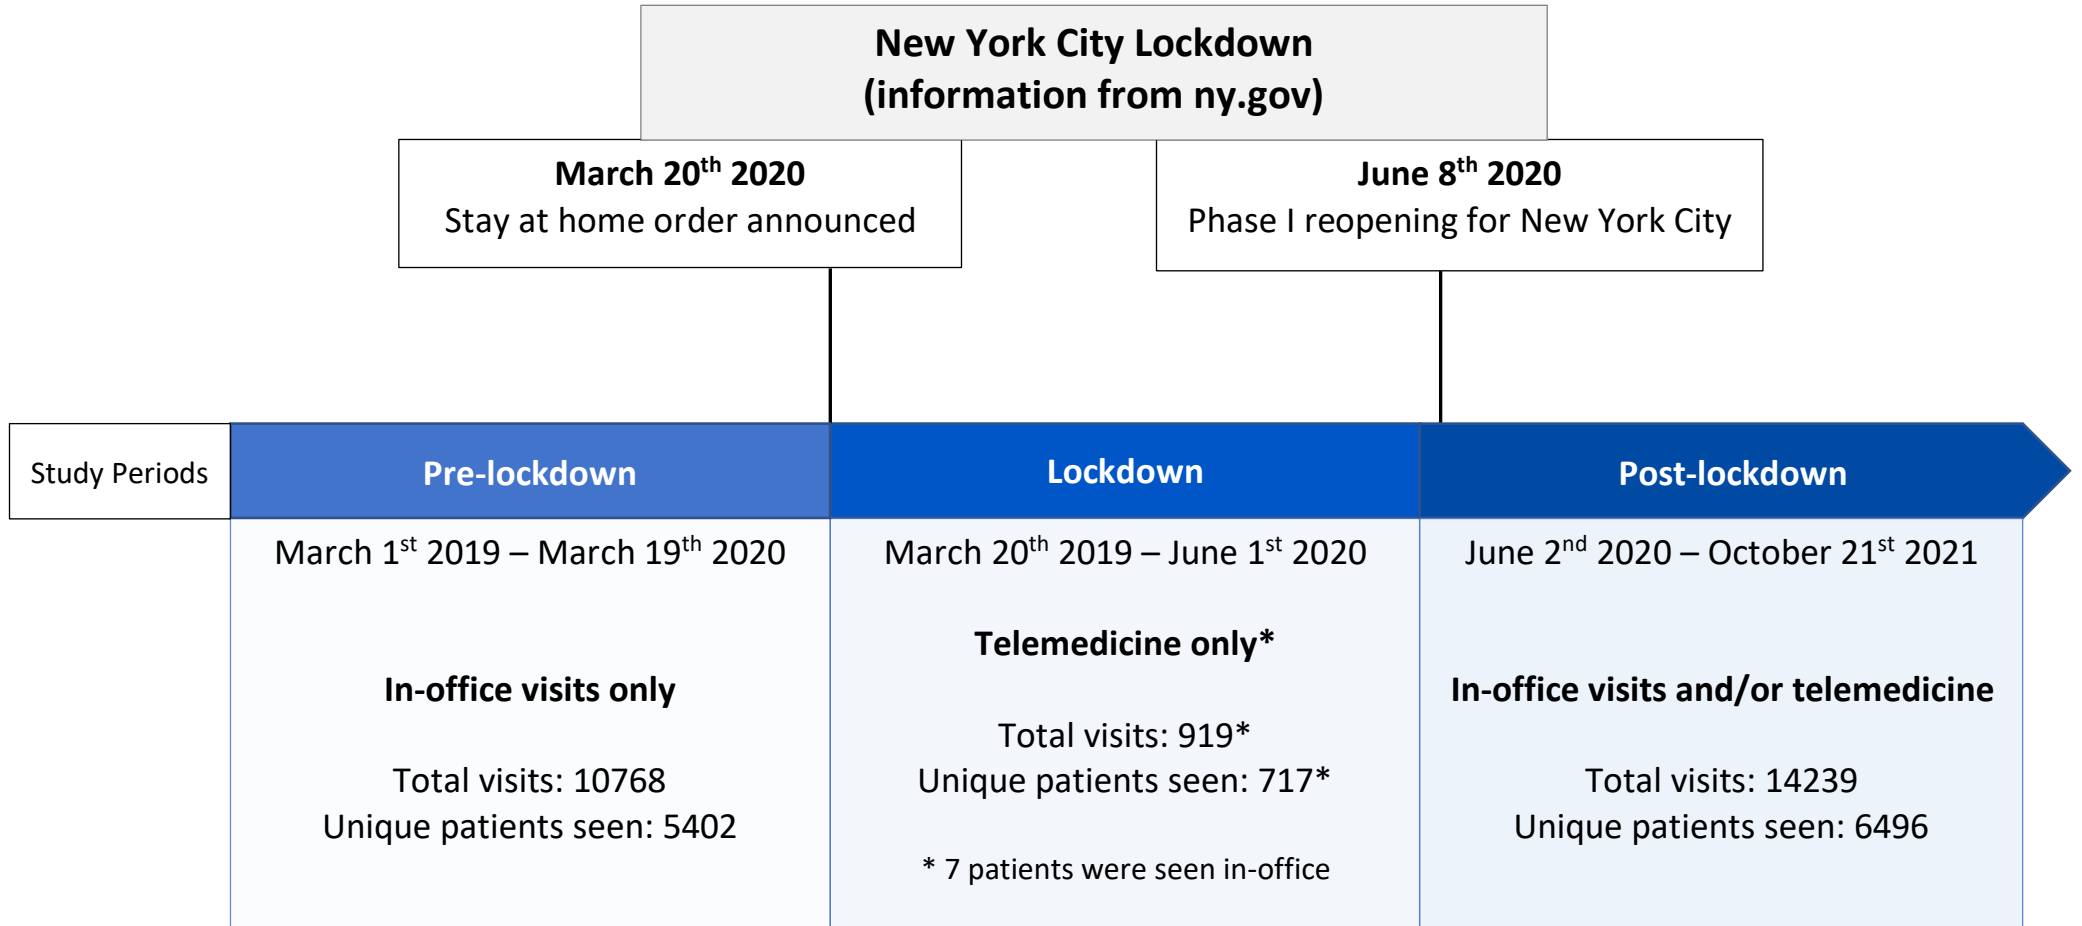

**Supplemental File 2:** Race/ethnicity of post-lockdown patients in New York/New Jersey (other states excluded). P-value was calculated using the Kruskal-Wallis test for independent parameters to compare groups.

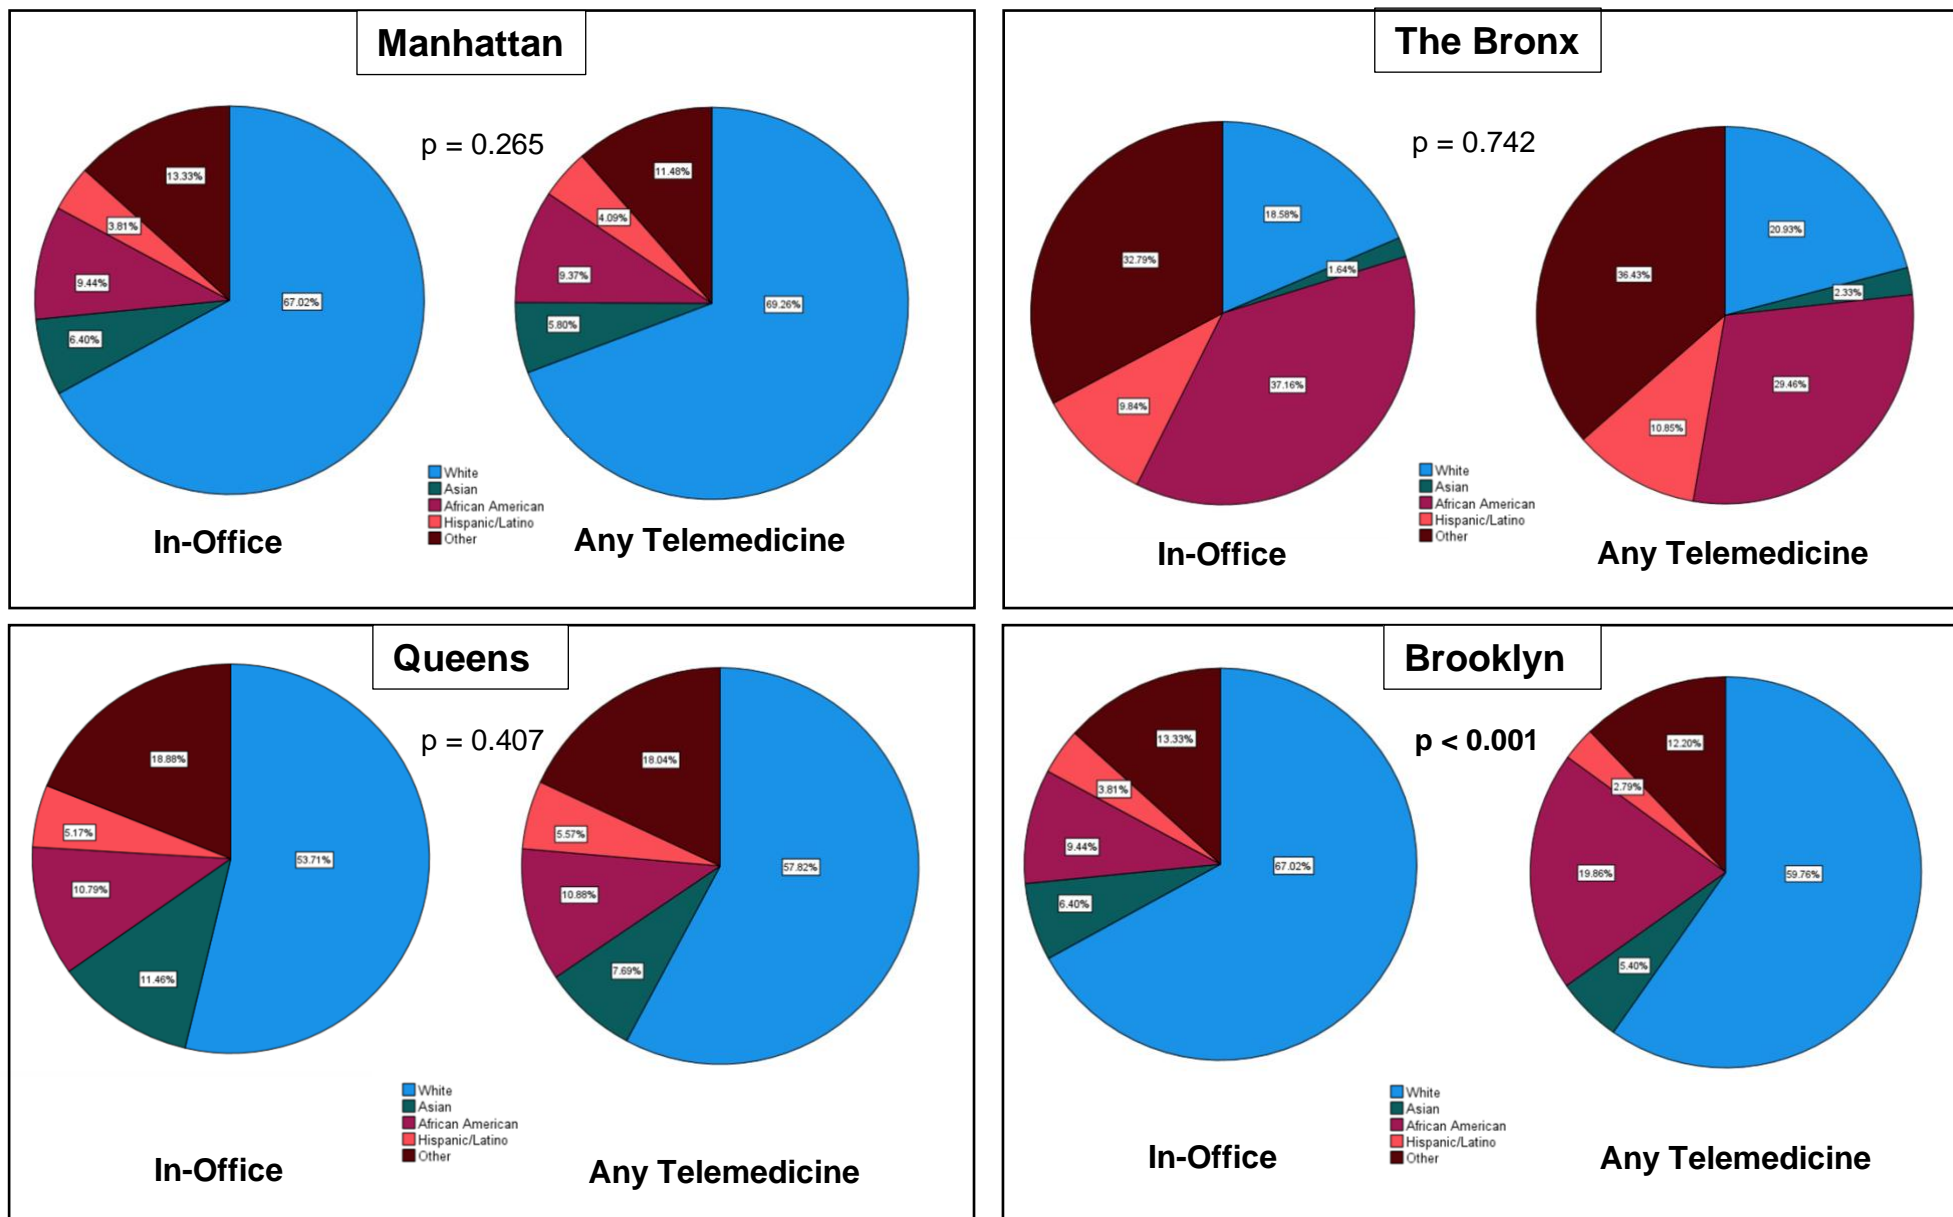

### Staten Island

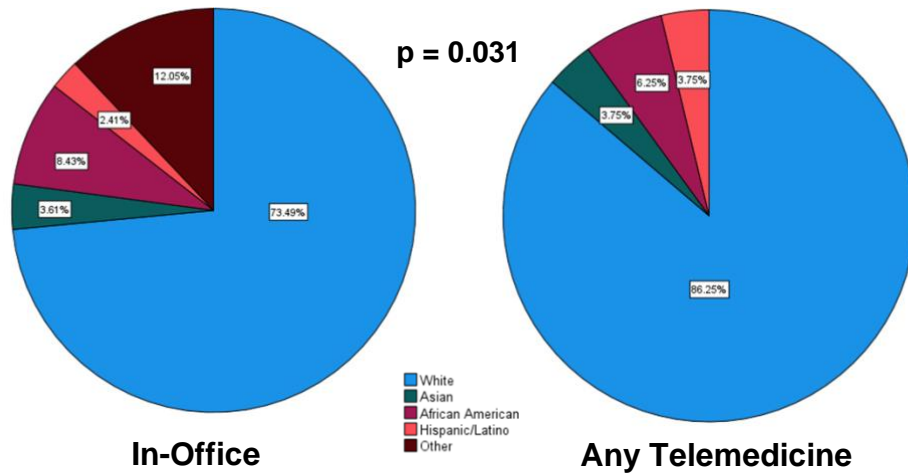

### Upstate New York

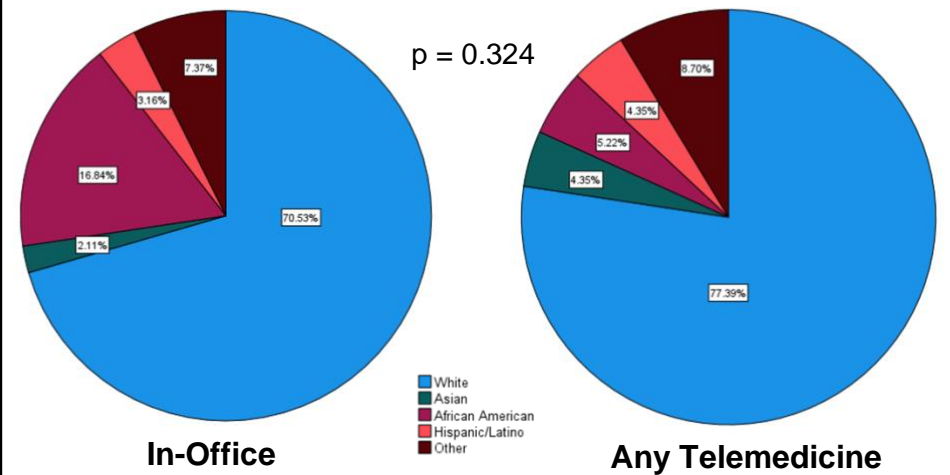

### New York State

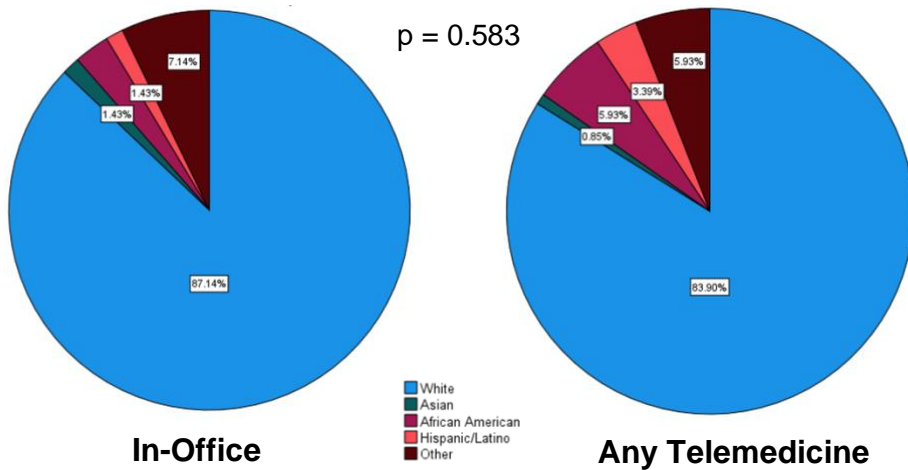

### New Jersey

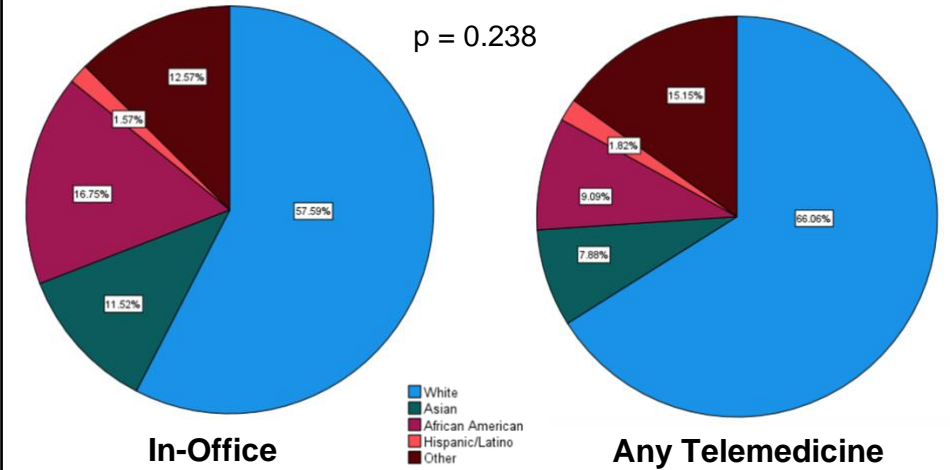

**Supplemental File 3:** Health insurance plans of post-lockdown patients in New York/New Jersey (other states excluded). P-value was calculated using the Kruskal-Wallis test for independent parameters to compare groups.

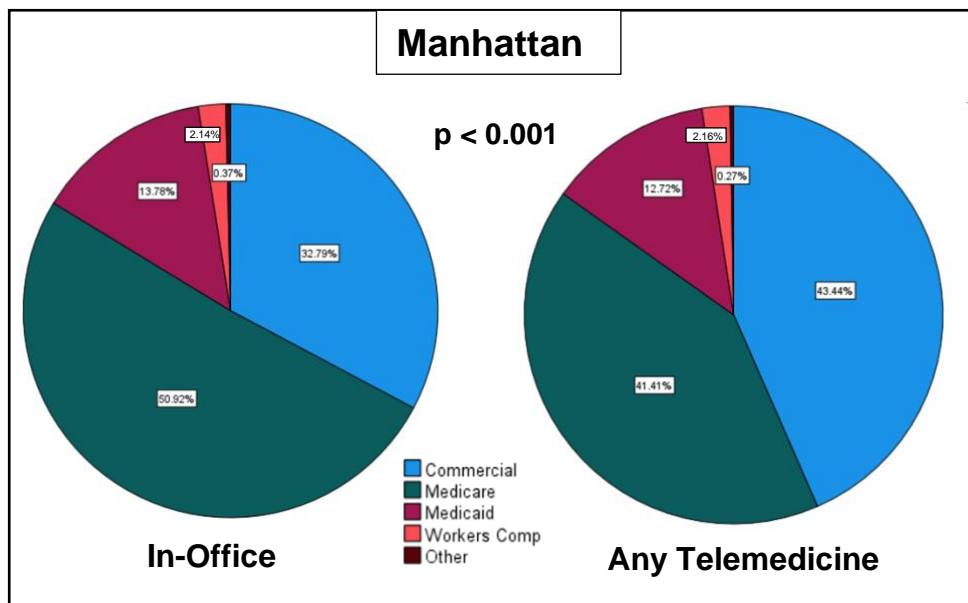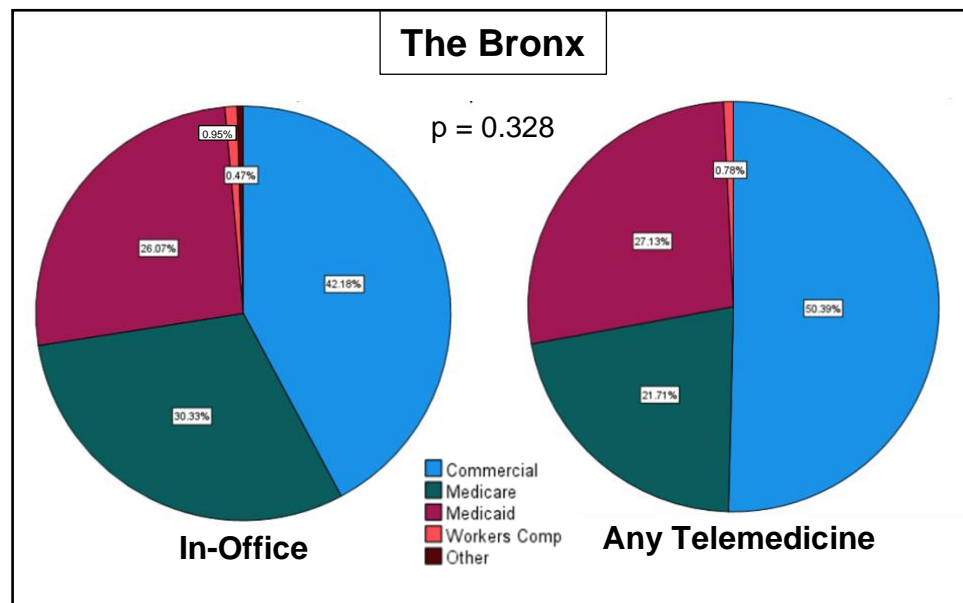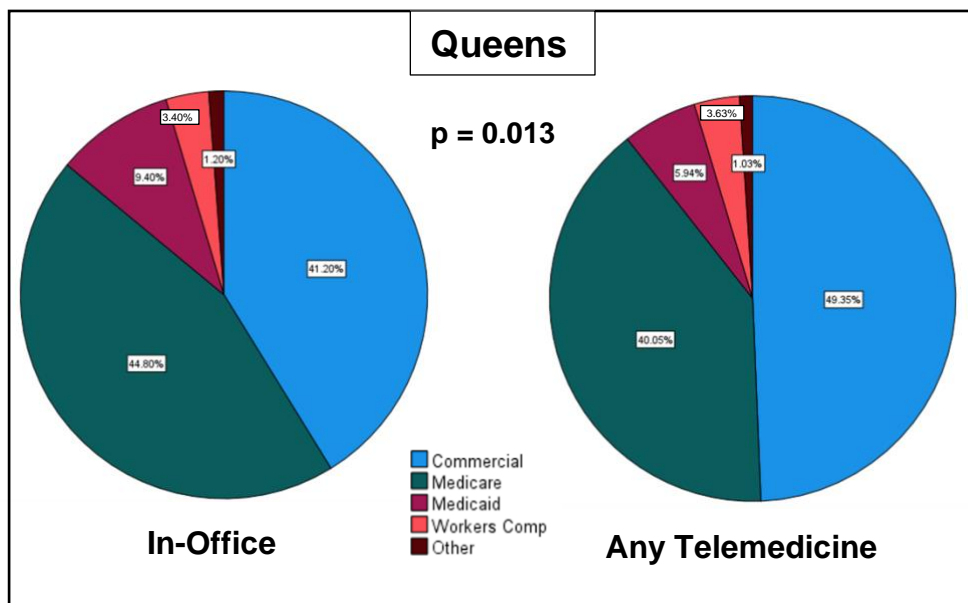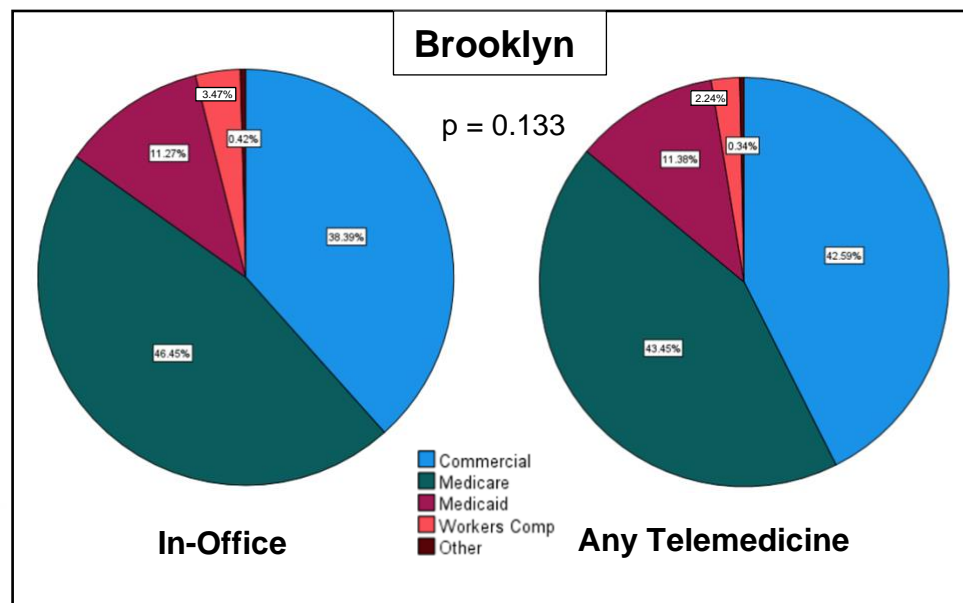

### Staten Island

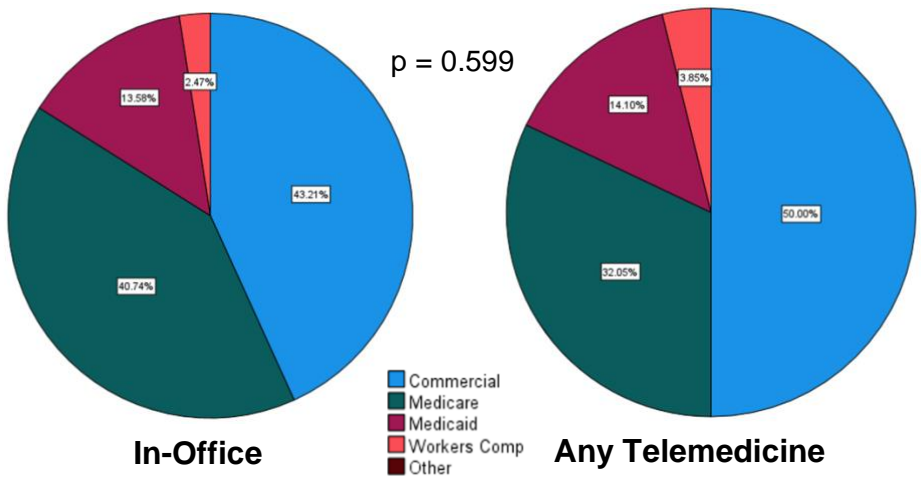

### Upstate New York

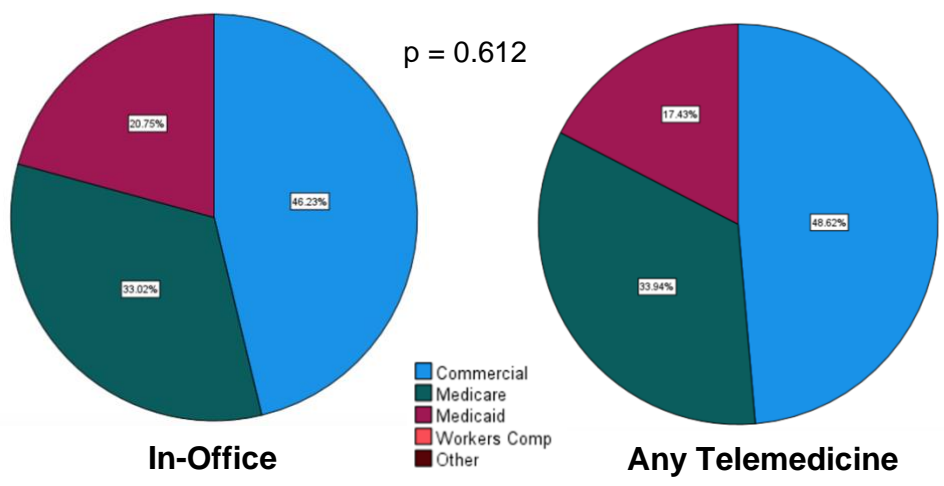

### New York State

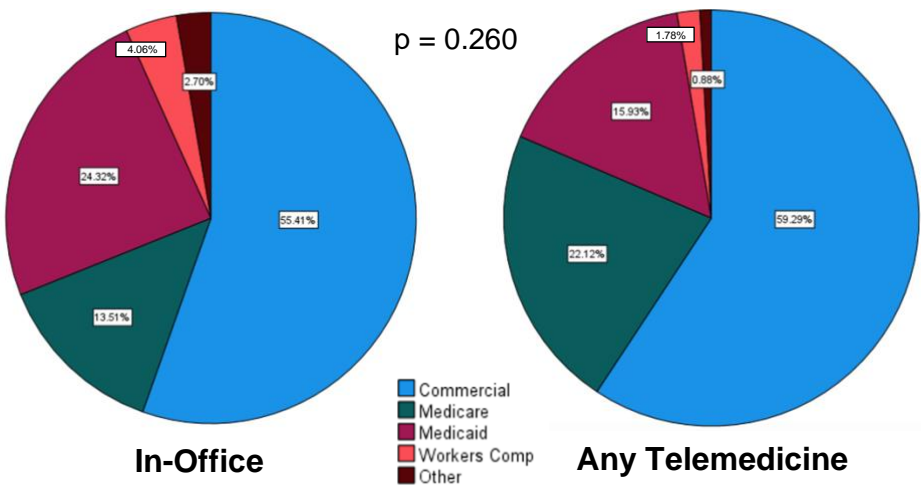

### New Jersey

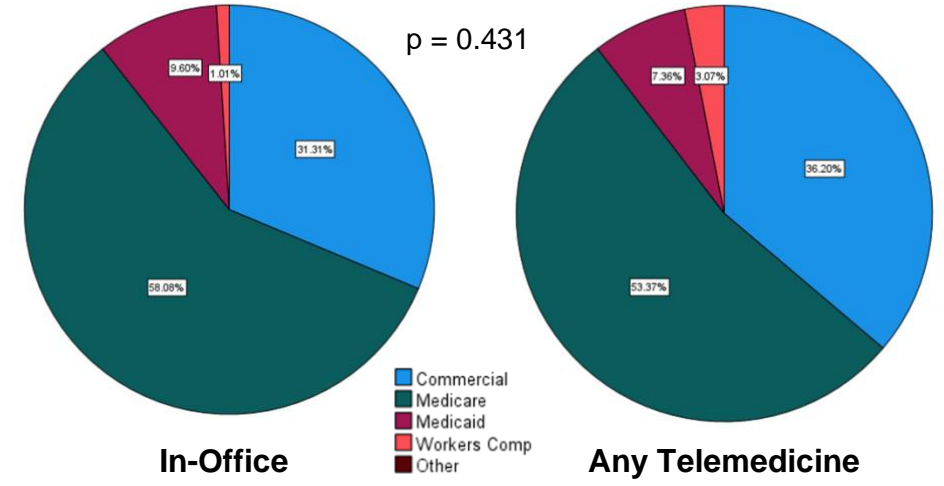

Supplement: Supplementary file 1 [file get_supplementary_file.php]
